# Supplementary material for: Effects of miniaturization in the anatomy of the minute springtail Mesaphorura sylvatica (Hexapoda: Collembola: Tullbergiidae)
Source: PeerJ journal article supplement (doi:10.7717/peerj.8037), 2019-11-13
Supplement: Fig_S2.pdf [file Fig_S2.pdf]

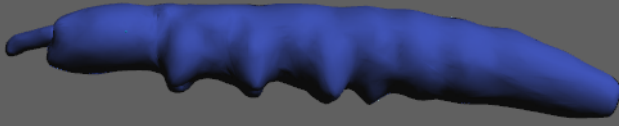

**Fig. S2. Interactive animated 3D reconstruction of the *Mesaphorura sylvatica*.** Click on the figure to start interactive 3D view. Colors: blue — cuticle, light blue — tentorium, green — digestive system, yellow — central nervous system, brown — musculature, purple — reproductive system, dark violet — excretory system.
