# Supplementary material for: Effects of miniaturization in the anatomy of the minute springtail Mesaphorura sylvatica (Hexapoda: Collembola: Tullbergiidae)
Source: PubMed Central journal article supplement (PMC6858819; doi:10.7717/peerj.8037), 2019-11-13
Supplement: peerj-07-8037-s004.pdf [file peerj-07-8037-s004.pdf]

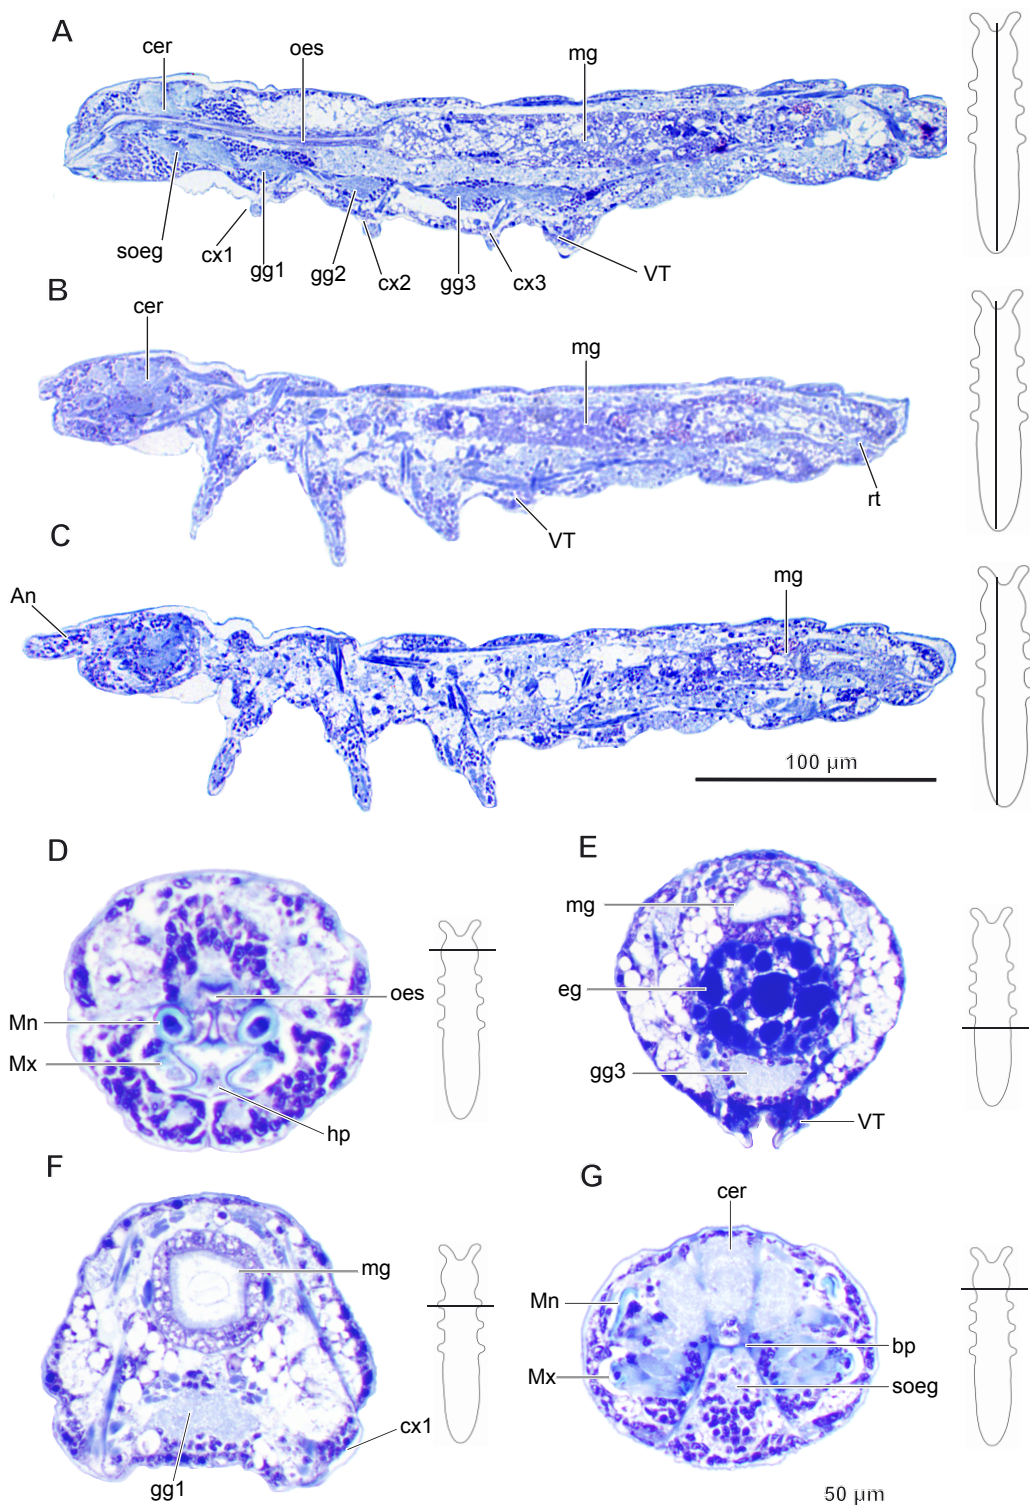

**Fig. S1.** Longitudinal (A – C) and cross-sections (D – G) of *Mesaphorura sylvatica*. An – antenna, bp – body of pseudotentorium, cer – cerebrum, cx1, 2, 3 – pro-, meso-, and metacoxae, eg – ovary lobe with eggs, gg1, gg2, gg3 – pro-, meso-, and metathoracic + abdominal ganglia, hp – hypopharynx, mg – midgut, Mn – mandible, Mx – maxilla, oes – oesophagus, rt – rectum, soeg – supraoesophageal ganglion, VT – ventral tube.
