# Supplementary material for: Effects of miniaturization in the anatomy of the minute springtail Mesaphorura sylvatica (Hexapoda: Collembola: Tullbergiidae)
Source: PeerJ journal article supplement (doi:10.7717/peerj.8037), 2019-11-13
Supplement: Table_S1.pdf [file Table_S1.pdf]

**Table S1.** Sizes of collembolan species with studied anatomy.

| Species                      | Studied by                                                                               | Modern name                        | Body size     | Source of body size | Comments                                                                                                                                                                                                       |
|------------------------------|------------------------------------------------------------------------------------------|------------------------------------|---------------|---------------------|----------------------------------------------------------------------------------------------------------------------------------------------------------------------------------------------------------------|
| <i>Anurida maritima</i>      | Fernald (1890),<br>Willem (1900),<br>Lécaillon (1902),<br>Denis (1928),<br>Wolter (1963) | <i>Anurida maritima</i>            | 3 mm          | Fjellberg, 1998     |                                                                                                                                                                                                                |
| <i>Isotoma grisea</i>        | Prowazek (1900)                                                                          | <i>Desoria</i> sp.                 | ~1.8 mm       | Fjellberg, 1998     | <i>Isotoma grisea</i> is called <i>Desoria</i> today. This species has a strict taxonomical understanding, while in the past its name was applied to a wide group of species.                                  |
| <i>Achorutes viaticus</i>    | Prowazek (1900),<br>Willem (1900)                                                        | <i>Hypogastrura viatica</i>        | 1.9 mm        | Fjellberg, 1998     |                                                                                                                                                                                                                |
| <i>Onychiurus fimetarius</i> | Denis (1928)                                                                             | <i>Onychiurus (sensu lato)</i> sp. | >1.3 mm       | Gisin, 1960         | In older publications the identification of this species is uncertain. Any species with complex PAO and without anal spines could be named as <i>O. fimetarius</i> . A very approximate average size is given. |
| <i>Tomocerus catalanus</i>   | Denis (1928)                                                                             | <i>Tomocerus catalanus</i>         | 4.5 mm        | Denis, 1924         |                                                                                                                                                                                                                |
| <i>Protanura carpenteri</i>  | Mukerji (1932)                                                                           | <i>Protanura carpenteri</i>        | 1.2 to 2.5 mm | Mukerji, 1932       |                                                                                                                                                                                                                |

|                                   |                                                                 |                                     |        |                 |                                                                                                                 |
|-----------------------------------|-----------------------------------------------------------------|-------------------------------------|--------|-----------------|-----------------------------------------------------------------------------------------------------------------|
| <i>Orchesella cincta</i>          | Folsom (1899),<br>Bretfeld, (1963),<br>Verhoef et al.<br>(1979) | <i>Orchesella cincta</i>            | 3 mm   | Fjellberg, 1998 |                                                                                                                 |
| <i>Neanura muscorum</i>           | Bretfeld, (1963),<br>Wolter (1963)                              | <i>Neanura muscorum</i>             | 3.5 mm | Fjellberg, 1998 |                                                                                                                 |
| <i>Tomocerus longicornis</i>      | Lubbock, (1873)                                                 | <i>Pogonognathellus longicornis</i> | 4-5 mm | Fjellberg, 1998 |                                                                                                                 |
| <i>Orchesella villosa</i>         | Imms (1939),<br>Dallai et al. (2008)                            | <i>Orchesella villosa</i>           | 4 mm   | Fjellberg, 1998 |                                                                                                                 |
| <i>Isotomurus palustris</i>       | Imms (1939)                                                     | <i>Isotomurus</i> sp.               | 2.5 mm | Fjellberg, 1998 | In older publications the identification of this species is uncertain. The average size for the genus is given. |
| <i>Podura aquatica</i>            | Willem (1900),<br>Imms (1939)                                   | <i>Podura aquatica</i>              | 2 mm   | Fjellberg, 1998 |                                                                                                                 |
| <i>Sminthurus viridis</i>         | Davies (1927),<br>Imms (1939)                                   | <i>Sminthurus viridis</i>           | 3 mm   | Fjellberg, 1998 |                                                                                                                 |
| <i>Tomocerus flavescens</i>       | Wolter (1963),<br>Humbert (1979)                                | <i>Pogonognathellus flavescens</i>  | 4-5 mm | Fjellberg, 1998 |                                                                                                                 |
| <i>Friesea mirabilis</i>          | Wolter (1963)                                                   | <i>Friesea mirabilis</i>            | 1.9 mm | Fjellberg, 1998 |                                                                                                                 |
| <i>Brachystomella parvula</i>     | Wolter (1963)                                                   | <i>Brachystomella parvula</i>       | 1.0 mm | Fjellberg, 1998 |                                                                                                                 |
| <i>Odontella armata</i>           | Wolter (1963)                                                   | <i>Xenyllodes armatus</i>           | 1.0 mm | Fjellberg, 1998 |                                                                                                                 |
| <i>Sminthurus fuscus</i>          | Willem & Sabbe<br>(1897), Willem<br>(1900)                      | <i>Allacma fusca</i>                | 3-4 mm | Fjellberg, 1998 |                                                                                                                 |
| <i>Onychiurus quadriocellatus</i> | Altner (1968)                                                   | <i>Protaphorura quadriocellata</i>  | 2.2 mm | Fjellberg, 1998 |                                                                                                                 |

|                                  |                                 |                                    |        |                            |                                                                                                                 |
|----------------------------------|---------------------------------|------------------------------------|--------|----------------------------|-----------------------------------------------------------------------------------------------------------------|
| <i>Tomocerus minor</i>           | Humbert (1975)                  | <i>Tomocerus minor</i>             | 4 mm   | Fjellberg, 1998            |                                                                                                                 |
| <i>Lepidocyrtus curvicollis</i>  | Humbert (1975)                  | <i>Lepidocyrtus curvicollis</i>    | 3 mm   | Fjellberg, 1998            |                                                                                                                 |
| <i>Orchesella rufescens</i>      | Philipstschenko (1907)          | <i>Orchesella spectabilis</i>      | 4 mm   | Fjellberg, 1998            | <i>O.rufescens</i> is a junior synonym of <i>O.spectabilis</i> (collembola.org.).                               |
| <i>Folsomia candida</i>          | Kollmann et al. (2011)          | <i>Folsomia candida</i>            | 2.5 mm | Fjellberg, 1998            |                                                                                                                 |
| <i>Protaphorura armata</i>       | Kollmann et al. (2011)          | <i>Protaphorura armata</i>         | 1.8 mm | Fjellberg, 1998            |                                                                                                                 |
| <i>Tetrodontophora bielensis</i> | Kollmann et al. (2011)          | <i>Tetrodontophora bielensis</i>   | 5-9 mm | Gisin, 1960                |                                                                                                                 |
| <i>Allacma fusca</i>             | Dallai et al. (2000)            | <i>Allacma fusca</i>               | 3-4 mm | Fjellberg, 1998            |                                                                                                                 |
| <i>Anurophorus laricis</i>       | Willem (1900), Lécaillon (1902) | <i>Anurophorus</i> sp.             | 1.4 mm | Fjellberg, 1998            | In older publications the identification of this species is uncertain. The average size for the genus is given. |
| <i>Lipura armata</i>             | Willem (1900)                   | <i>Protaphorura</i> sp.            | 1.8 mm |                            | In older publications the identification of this species is uncertain. The average size for the genus is given. |
| <i>Anura muscorum</i>            | Willem (1900)                   | <i>Neanura muscorum</i>            | 3.5 mm | Fjellberg, 1998            |                                                                                                                 |
| <i>Isotoma viridis</i>           | Willem (1900)                   | <i>Isotoma viridis</i>             | 3-4 mm | Fjellberg, 1998            |                                                                                                                 |
| <i>Tomocerus plumbeus</i>        | Willem (1900)                   | <i>Pogonognathellus flavescens</i> | 4-5 mm | Fjellberg, 1998            | So far <i>Tomocerus plumbeus</i> is considered to be a synonym of <i>P.flavescens</i> .                         |
| <i>Papirius</i> sp.              | Willem (1900)                   | <i>Dicyrtomidae</i> g.sp.          | 2 mm   | Fjellberg, 1998            | The average size for the family is given.                                                                       |
| <i>Megalothorax minimus</i>      | Willem (1900)                   | <i>Megalothorax</i> sp.            | 0.5 mm | Schneider et d'Haese, 2013 | In older publications the identification of this species is uncertain. The average size for the genus is given. |

Additional reference

Denis, JR. 1924. Sur la faune française des Atérigotes, V. Note préliminaire. *Bulletin de la Société Entomologique de France* , 49:197–199

Fjellberg A. 1998. The Collembola of Fennoscandia and Denmark. Part 1: Poduromorpha fauna. *Entomologica Scandinavica* . Leiden:Brill Academic

Gisin H. 1960. Collembolanfauna Europas. *Museum Histoire Naturelle*. Genève, Switzerland

Schneider C, D'Haese CA. 2013. Morphological and molecular insights on Megalothorax: the largest Neelipleona genus revisited (Collembola). *Invertebrate Systematics*, 27:317–364
