# Supplementary material for: Effects of miniaturization in the anatomy of the minute springtail Mesaphorura sylvatica (Hexapoda: Collembola: Tullbergiidae)
Source: PeerJ journal article supplement (doi:10.7717/peerj.8037), 2019-11-13
Supplement: Table_S2.pdf [file Table_S2.pdf]

**Table S2.** Volumes of organs of *Mesaphorura sylvatica*.

| <b>System</b>                   | <b>Volume, nl</b> | <b>Relative volume, %</b> |
|---------------------------------|-------------------|---------------------------|
| Skeleton                        | 0.048             | 5.8                       |
| Digestive and excretory systems | 0.068             | 8.6                       |
| Central nervous system*         | 0.051             | 6.3                       |
| *of which the brain             | 0.016             | 2.2                       |
| Muscular system                 | 0.038             | 5.2                       |
| Reproductive system             | 0.15              | 18.9                      |
| Circulatory system and fat body | 0.44              | 55.2                      |
