# Supplementary material for: Effects of miniaturization in the anatomy of the minute springtail Mesaphorura sylvatica (Hexapoda: Collembola: Tullbergiidae)
Source: PeerJ journal article supplement (doi:10.7717/peerj.8037), 2019-11-13
Supplement: Table_S3.pdf [file Table_S3.pdf]

**Table S3.** Nomenclature of muscles used in the present study and in others.

| Head                              |                                     | Thorax                            |                                    |                                       | Abdomen                           |                                    |                                       |
|-----------------------------------|-------------------------------------|-----------------------------------|------------------------------------|---------------------------------------|-----------------------------------|------------------------------------|---------------------------------------|
| This study,<br><i>Mesaphorura</i> | Folsom (1899),<br><i>Orchesella</i> | This study,<br><i>Mesaphorura</i> | Bretfeld (1963),<br><i>Neanura</i> | Bretfeld (1963),<br><i>Orchesella</i> | This study,<br><i>Mesaphorura</i> | Bretfeld (1963),<br><i>Neanura</i> | Eisenbeis (1976),<br><i>Tomocerus</i> |
| 1(Oe)                             | dil. oe. x7                         | Prothorax                         | Prothorax                          | Prothorax                             | A I dlm1                          | I dlm1                             | -                                     |
| -                                 | dil.phy. X4                         | I dlm1                            | I dlm1                             | I dlm                                 | AI dlm2                           | I dlm2                             | -                                     |
| -                                 | dep.                                | I dlm2                            | I dlm2                             | I dlm                                 | AI vlm                            | I vlm                              | -                                     |
| -                                 | 1. rot. l.                          | I vlm                             | I vlm                              | I vlm                                 | AI ism1                           | I ism1                             | -                                     |
| -                                 | 2. abd.                             | I ism1                            | I ism1                             | I ism1                                | AI ism2                           | I ism2                             | -                                     |
| 3(Mn)                             | 3. ret. rot.                        | I ism2                            | I ism2                             | I ism2                                | AI dvm1                           | I dvm1                             | -                                     |
| 4(Mn)                             | 4. ret.                             | -                                 | -                                  | I ism3                                | AI dvm2                           | I dvm2                             | -                                     |
| 5(Mn)                             | 5. pr't. l.                         | -                                 | -                                  | I ism4                                | AI dvm3                           | I dvm3?                            | -                                     |
| -                                 | 6. pr't. ms.                        | I dvm1                            | I dvm1                             | -                                     | AI dvm4                           | I dvm4?                            | -                                     |
| 7(Mn)                             | 7. rot.                             | I dvm2                            | I dvm2                             | -                                     | AI dvm VT                         | I dvm VT                           | -                                     |
| 8(Mn)                             | 8. rot.                             | -                                 | I dvm3                             | -                                     | AI lm                             | -                                  | lm                                    |
| 9(Mn)                             | 9. add.                             | -                                 | I dvm4                             | -                                     | AI pm1                            | -                                  | pm1                                   |
| 10(Mn)                            | 10. rot.                            | -                                 | I dvm5                             | -                                     | AI pm2                            | -                                  | pm2                                   |
| 11(Mn)                            | -                                   | -                                 | I dvm6                             | -                                     | AI pm3                            | -                                  | pm3                                   |
| 12(Mn)                            | -                                   | I ldvm1                           | I ldvm1                            | I ldvm                                | AI pm4                            | -                                  | pm4? pm5? pm6?                        |
| 1(Mx)                             | 1. ret. abd.                        | d1m1 (in the head)                | Lb d1m1                            | -                                     | AI dm1                            | -                                  | dm1                                   |
| 2(Mx)                             | 2. add.                             | d1m2 (in the head)                | Lb d1m2                            | -                                     | AI dm2                            | -                                  | dm2                                   |
| 3(Mx)                             | 3. add.                             | -                                 | Lb v1m1                            | Lb v1m1                               | AI dm3                            | -                                  | dm3                                   |
| 4(Mx)                             | 4. add.                             | -                                 | Lb v1m2                            | Lb v1m2                               | AI dm4                            | -                                  | dm4                                   |
| 5(Mx)                             | 5. pr't. add.                       | -                                 | -                                  | Lb ism                                | AI dm5                            | -                                  | dm5? dm6?                             |
| -                                 | 6. prt. add.                        | Lb dvm1                           | Lb dvm1                            | -                                     | AI ldvm1                          | I ldvm1                            | -                                     |
| 7(Mx)                             | 7. add.                             | Lb dvm2                           | Lb dvm2                            | -                                     | AII d1m1                          | II d1m1                            | -                                     |
| -                                 | 8. ret. add.                        | -                                 | Lb ldvm1                           | Lb ldvm?                              | AII d1m2                          | II d1m2                            | -                                     |
| -                                 | 9. pr't. add.                       | -                                 | Lb ldvm2                           | -                                     | AII vlm                           | II vlm                             | -                                     |
| -                                 | 10. add.                            | I scm1                            | -                                  | -                                     | AII ism1                          | II ism1                            | -                                     |
| -                                 | 1. dep. p.                          | I scm2                            | -                                  | -                                     | AII ism2                          | II ism2                            | -                                     |
| 2(Lb)                             | 2. lvt. ms.                         | I scm3                            | -                                  | -                                     | AII dvm1                          | II dvm1                            | -                                     |
| -                                 | 3. dep. a.                          | I scm4                            | -                                  | -                                     | AII dvm2                          | II dvm2                            | -                                     |
| 4(Lb)                             | 4. lvt. m.                          | Mesothorax                        | Mesothorax                         | Mesothorax                            | AII dvm3                          | II dvm3                            | -                                     |
| 5(Lb)                             | 5. lvt. l.                          | II d1m1                           | II d1m1                            | II d1m1                               | AII dvm4                          | II dvm4                            | -                                     |
| d1m1                              | -                                   | II d1m2                           | II d1m2                            | II d1m2                               | AII ldvm1                         | II ldvm1                           | -                                     |
| d1m2                              | -                                   | II v1m                            | II v1m                             | II v1m                                | AII trm1                          | II trm1                            | -                                     |
| 1(An)                             | -                                   | II ism1                           | II ism1                            | II ism1                               | AIII d1m1                         | III d1m1                           | -                                     |
|                                   |                                     | II ism2                           | II ism2                            | II ism2                               | AIII d1m2                         | III d1m2                           | -                                     |
|                                   |                                     | -                                 | II ism3                            | II ism3                               | AIII ism1                         | III ism1                           | -                                     |
|                                   |                                     | -                                 | II ism4                            | II ism4                               | AIII ism2                         | III ism2                           | -                                     |
|                                   |                                     | II dvm1                           | -                                  | II dvm1                               | AIII dvm1                         | III dvm1                           | -                                     |
|                                   |                                     | II dvm2                           | II dvm2                            | II dvm2                               | AIII dvm2                         | III dvm2                           | -                                     |
|                                   |                                     | II dvm3                           | II dvm3                            | -                                     | AIII dvm3                         | III dvm3?                          | -                                     |
|                                   |                                     | II dvm4                           | II dvm4                            | -                                     | AIII dvm4                         | III dvm4?                          | -                                     |
|                                   |                                     | II dvm5                           | II dvm5                            | -                                     | AIII ldvm1                        | III ldvm1                          | -                                     |
|                                   |                                     | -                                 | II dvm6                            | -                                     | AIV d1m1                          | IV d1m1                            | -                                     |
|                                   |                                     | II ldvm1                          | II ldvm1                           | II ldvm1                              | AIV d1m2                          | IV d1m2                            | -                                     |
|                                   |                                     | II ldvm2                          | II ldvm2                           | II ldvm2                              | AIV vlm                           | IV vlm                             | -                                     |
|                                   |                                     | II ldvm3                          | II ldvm3                           | II ldvm3                              | AIV ism1                          | IV ism1? IV ism2?                  | -                                     |
|                                   |                                     | -                                 | II ldvm4                           | II ldvm4                              | AIV dvm1                          | IV dvm1                            | -                                     |
|                                   |                                     | II scm1                           | -                                  | -                                     | AIV dvm2                          | IV dvm2                            | -                                     |
|                                   |                                     | II scm2                           | -                                  | -                                     | AIV dvm3                          | -                                  | -                                     |
|                                   |                                     | II scm3                           | -                                  | -                                     | AIV ldvm3                         | IV ldvm3                           | -                                     |
|                                   |                                     | II scm4                           | -                                  | -                                     | AIV ldvm4                         | IV ldvm4                           | -                                     |
|                                   |                                     | II scm5                           | -                                  | -                                     | AIV ldvm5                         | IV ldvm5                           | -                                     |
|                                   |                                     | II scm6                           | -                                  | -                                     | AIV ldvm7                         | IV ldvm7                           | -                                     |
|                                   |                                     | Metathorax                        | Metathorax                         | Metathorax                            | AV d1m1                           | V d1m1                             | -                                     |
|                                   |                                     | III d1m1                          | III d1m1                           | III d1m1                              | AV d1m2                           | V d1m2                             | -                                     |
|                                   |                                     | III d1m2                          | III d1m2                           | III d1m2                              | AV ism1                           | V ism1? V ism2?                    | -                                     |
|                                   |                                     | III v1m                           | III v1m                            | III v1m                               | AV ldvm1                          | -                                  | -                                     |
|                                   |                                     | III ism1                          | III ism1                           | III ism1                              | AV1 sm1                           | -                                  | -                                     |
|                                   |                                     | III ism2                          | III ism2                           | III ism2                              | AV1 sm2                           | -                                  | -                                     |
|                                   |                                     | III dvm1                          | III dvm1                           | III dvm1                              | AV1 dvm1                          | -                                  | -                                     |
|                                   |                                     | III dvm2                          | III dvm2                           | III dvm2                              | AV1 dvm2                          | -                                  | -                                     |
|                                   |                                     | III dvm3                          | III dvm3                           | -                                     | AV1 dvm3                          | -                                  | -                                     |
|                                   |                                     | III dvm4                          | III dvm4                           | -                                     | AV1 dvm4                          | -                                  | -                                     |
|                                   |                                     | III dvm5                          | III dvm5                           | -                                     | -                                 | -                                  | -                                     |
|                                   |                                     | -                                 | III dvm6                           | -                                     | -                                 | -                                  | -                                     |
|                                   |                                     | III ldvm1                         | III ldvm1                          | III ldvm1                             | -                                 | -                                  | -                                     |
|                                   |                                     | III ldvm2                         | III ldvm2                          | III ldvm2                             | -                                 | -                                  | -                                     |
|                                   |                                     | III ldvm3                         | III ldvm3                          | III ldvm3                             | -                                 | -                                  | -                                     |
|                                   |                                     | -                                 | III ldvm4                          | III ldvm4                             | -                                 | -                                  | -                                     |
|                                   |                                     | III scm2                          | -                                  | -                                     | -                                 | -                                  | -                                     |
|                                   |                                     | III scm3                          | -                                  | -                                     | -                                 | -                                  | -                                     |
|                                   |                                     | III scm5                          | -                                  | -                                     | -                                 | -                                  | -                                     |
|                                   |                                     | III scm6                          | -                                  | -                                     | -                                 | -                                  | -                                     |
|                                   |                                     | III scm7                          | -                                  | -                                     | -                                 | -                                  | -                                     |
